# Supplementary material for: The Potential Economic Impact of the Updated COVID-19 mRNA Fall 2023 Vaccines in Japan
Source: MDPI journal article supplement (doi:10.3390/vaccines12040434), 2024-04-18
Supplement: s1 [file s1]

## ADDITIONAL RESULTS TABLES

**Table S1. Base-case Quality-Adjusted Life-Years (QALYs) Lost**

|              | Total QALYs Lost |                  |                  | Total QALYs Gained (Moderna Vaccine Vs.) |                | % Change (Moderna Vaccine Vs.) |                |
|--------------|------------------|------------------|------------------|------------------------------------------|----------------|--------------------------------|----------------|
|              | No Vaccine       | Moderna Vaccine  | Pfizer Vaccine   | No Vaccine                               | Pfizer Vaccine | No Vaccine                     | Pfizer Vaccine |
| Morbidity    | 1,303,544        | 1,036,697        | 1,077,133        | 266,847                                  | 40,436         | 20.5%                          | 3.8%           |
| Mortality    | 496,664          | 289,642          | 309,998          | 207,022                                  | 20,356         | 41.7%                          | 6.6%           |
| <b>Total</b> | <b>1,800,209</b> | <b>1,326,339</b> | <b>1,387,131</b> | <b>473,870</b>                           | <b>60,792</b>  | <b>26.3%</b>                   | <b>4.4%</b>    |

**Table S2. Base-case Disaggregated Economic Results**

| Economic Results (Yen, in millions)   |                   |                   |                   |                                       |                 |                                |                |
|---------------------------------------|-------------------|-------------------|-------------------|---------------------------------------|-----------------|--------------------------------|----------------|
| Costs:                                | Total Costs       |                   |                   | Cost Difference (Moderna Vaccine Vs.) |                 | % Change (Moderna Vaccine Vs.) |                |
|                                       | No Vaccine        | Moderna Vaccine   | Pfizer Vaccine    | No Vaccine                            | Pfizer Vaccine  | No Vaccine                     | Pfizer Vaccine |
| Vaccination*                          | ¥0                | ¥1,120,028        | ¥1,120,028        | ¥1,120,028                            | ¥0              | --                             | 0%             |
| Adverse Events                        | ¥0                | ¥3,422            | ¥3,422            | ¥3,422                                | ¥0              | --                             | 0%             |
| Outpatient Care                       | ¥1,106,588        | ¥885,165          | ¥919,240          | -¥221,423                             | -¥34,076        | -20%                           | -4%            |
| Hospitalization                       | ¥663,846          | ¥399,576          | ¥425,841          | -¥264,270                             | -¥26,265        | -40%                           | -6%            |
| Infection-Related Myocarditis         | ¥908              | ¥692              | ¥722              | -¥216                                 | -¥30            | -24%                           | -4%            |
| <b>Total (treatment-related)</b>      | <b>¥1,771,342</b> | <b>¥1,285,433</b> | <b>¥1,345,803</b> | <b>-¥485,909</b>                      | <b>-¥60,370</b> | <b>-27%</b>                    | <b>-4%</b>     |
| <b>Total (healthcare perspective)</b> | <b>¥1,771,342</b> | <b>¥2,408,883</b> | <b>¥2,469,253</b> | <b>¥637,540</b>                       | <b>-¥60,370</b> | <b>36%</b>                     | <b>-2%</b>     |
| Lost productivity                     | ¥1,852,273        | ¥1,595,264        | --                | -¥257,009                             | --              | -14%                           | --             |
| <b>Total (societal perspective)</b>   | <b>¥3,623,615</b> | <b>¥4,004,147</b> | <b>--</b>         | <b>¥380,532</b>                       | <b>--</b>       | <b>11%</b>                     | <b>--</b>      |

**Table S3. Deterministic sensitivity analysis economic results (Moderna Updated Fall 2023 Vaccine relative to No Fall 2023 Vaccine)**

|                                 |                                          | ICER<br>(¥ per QALY Gained) |            | Change from<br>Base-Case |            | Change from<br>Base-Case (%) |            |
|---------------------------------|------------------------------------------|-----------------------------|------------|--------------------------|------------|------------------------------|------------|
| Model Parameter                 | Variation                                | Low Value                   | High Value | Low Value                | High Value | Low Value                    | High Value |
| Moderna Fall 2023 Vaccine Cost  | ¥10,072 - ¥18,525                        | ¥1,044,141                  | ¥2,338,205 | -¥301,251                | ¥992,813   | -22%                         | 74%        |
| Discount rate                   | (0%, 4%) per guidelines                  | ¥1,247,145                  | ¥1,428,575 | -¥98,246                 | ¥83,183    | -7%                          | 6%         |
| Perspective                     | Societal                                 | ¥803,030                    |            | -¥542,362                |            | -40%                         |            |
| Target population               | 60-64 high-risk and 65+ general          | ¥911,015                    |            | -¥434,377                |            | -32%                         |            |
| Target population               | 65+ general                              | ¥942,104                    |            | -¥403,288                |            | -30%                         |            |
| Vaccination strategy            | 2 booster                                | ¥1,599,586                  |            | ¥254,194                 |            | 19%                          |            |
| Hospitalization rates           | See clinical manuscript                  | ¥1,491,297                  | ¥1,173,984 | ¥145,905                 | -¥171,408  | 11%                          | -13%       |
| Mortality rates                 | 95% CI                                   | ¥1,427,202                  | ¥1,264,468 | ¥81,810                  | -¥80,924   | 6%                           | -6%        |
| Initial VE: hospitalization     | Lower and upper bounds from VERSUS       | ¥2,204,076                  | ¥1,092,674 | ¥858,684                 | -¥252,718  | 64%                          | -19%       |
| Initial VE: infection           | Lower and upper bounds from VERSUS       | ¥3,843,331                  | ¥539,116   | ¥2,497,939               | -¥806,276  | 186%                         | -60%       |
| Vaccine waning: hospitalization | Decreased and increased fall 2023 waning | ¥1,223,119                  | ¥1,529,712 | -¥122,273                | ¥184,320   | -9%                          | 14%        |
| Vaccine waning: infection       | Decreased and increased fall 2023 waning | ¥595,046                    | ¥4,274,696 | -¥750,346                | ¥2,929,304 | -56%                         | 218%       |
| Vaccine coverage                | 50%, 75%                                 | ¥1,411,804                  | ¥1,397,851 | ¥66,412                  | ¥52,459    | 5%                           | 4%         |
| Incidence                       | Immune Escape April 2024                 | ¥2,051,738                  |            | ¥706,346                 |            | 53%                          |            |
| Incidence                       | Immune Escape June 2024                  | ¥2,151,514                  |            | ¥806,122                 |            | 60%                          |            |
| Incidence                       | Adjusted Tokyo Data (2.5x)               | ¥5,634,508                  |            | ¥4,289,117               |            | 319%                         |            |

|                                              |                                            |            |            |            |          |      |     |
|----------------------------------------------|--------------------------------------------|------------|------------|------------|----------|------|-----|
| Incidence                                    | Adjusted Tokyo Data (1.5x)                 | ¥495,259   |            | -¥850,133  |          | -63% |     |
| Incidence                                    | Seasonality: phi=0.2                       | ¥1,205,428 |            | -¥139,964  |          | -10% |     |
| Incidence                                    | Adjusted Tokyo Data (2.0x), Revised Waning | ¥2,954,554 |            | ¥1,609,162 |          | 120% |     |
| Hospitalization cost                         | +25%, -25%                                 | ¥1,205,970 | ¥1,484,813 | -¥139,421  | ¥139,421 | -10% | 10% |
| Percentage with symptoms                     | 95% CI (upper bound, lower bound)          | ¥1,118,259 | ¥1,625,364 | -¥227,133  | ¥279,972 | -17% | 21% |
| Outpatient cost                              | +25%, -25%                                 | ¥1,228,576 | ¥1,462,208 | -¥116,816  | ¥116,816 | -9%  | 9%  |
| QALY Losses (non-hospitalized, hospitalized) | +25%, -25%                                 | ¥1,178,971 | ¥1,566,518 | -¥166,421  | ¥221,126 | -12% | 16% |
| Percentage in ICU                            | 95% CI (upper bound, lower bound)          | ¥1,336,406 | ¥1,354,394 | -¥8,986    | ¥9,002   | -1%  | 1%  |

A sensitivity analyses was conducted with the unit price of the Moderna updated COVID-19 mRNA Fall 2023 vaccine unit cost. If the unit cost of the vaccine is increased from ¥12,040 to ¥32,513, the incremental cost-effectiveness ratio (ICER) for the Moderna vaccine compared to no vaccine will be ¥5 million per quality-adjusted life-years (QALYs) gained. If the unit cost is increased to ¥39,045 or ¥65,174 the cost per QALY gained will be ¥6 million and ¥10 million respectively.

**Table S4. Deterministic sensitivity analysis clinical results (Moderna Updated Fall 2023 Vaccine relative to No Fall 2023 Vaccine)**

| Scenario                        | Symptomatic infections |              |            | Hospitalizations |              |           | Deaths     |              |           |
|---------------------------------|------------------------|--------------|------------|------------------|--------------|-----------|------------|--------------|-----------|
|                                 | No Vaccine             | With Vaccine | Prevented  | No Vaccine       | With Vaccine | Prevented | No Vaccine | With Vaccine | Prevented |
| Base case                       | 35,240,923             | 28,055,308   | 7,185,614  | 689,973          | 417,839      | 272,133   | 61,738     | 36,128       | 25,610    |
| 60-64 high-risk and 65+ general | 35,240,923             | 32,077,805   | 3,163,118  | 689,973          | 484,803      | 205,170   | 61,738     | 40,427       | 21,311    |
| 65+ general                     | 35,240,923             | 32,375,370   | 2,865,553  | 689,973          | 510,882      | 179,090   | 61,738     | 42,404       | 19,335    |
| 2 booster*                      | 35,240,923             | 25,549,267   | 9,691,656  | 689,973          | 365,258      | 324,715   | 61,738     | 30,961       | 30,777    |
| Higher hospitalization rates    | 35,240,923             | 28,055,308   | 7,185,614  | 799,370          | 483,249      | 316,121   | 71,558     | 41,868       | 29,690    |
| Lower hospitalization rates     | 35,240,923             | 28,055,308   | 7,185,614  | 607,756          | 368,653      | 239,103   | 54,320     | 31,792       | 22,528    |
| Higher mortality rate           | 35,240,923             | 28,055,308   | 7,185,614  | 689,973          | 417,839      | 272,133   | 68,072     | 39,831       | 28,241    |
| Lower mortality rate            | 35,240,923             | 28,055,308   | 7,185,614  | 689,973          | 417,839      | 272,133   | 55,920     | 32,734       | 23,186    |
| Low hospital initial VE         | 35,240,923             | 28,055,308   | 7,185,614  | 689,973          | 569,299      | 120,673   | 61,738     | 51,058       | 10,680    |
| High hospital initial VE        | 35,240,923             | 28,055,308   | 7,185,614  | 689,973          | 351,576      | 338,397   | 61,738     | 29,597       | 32,141    |
| Low infection initial VE        | 35,240,923             | 33,484,368   | 1,756,555  | 689,973          | 482,140      | 207,833   | 61,738     | 42,242       | 19,496    |
| High infection initial VE       | 35,240,923             | 22,582,279   | 12,658,644 | 689,973          | 343,660      | 346,313   | 61,738     | 29,291       | 32,447    |
| Low waning (infection)          | 35,240,923             | 23,163,057   | 12,077,866 | 689,973          | 350,508      | 339,465   | 61,738     | 29,973       | 31,765    |
| High waning (infection)         | 35,240,923             | 33,776,540   | 1,464,382  | 689,973          | 492,991      | 196,982   | 61,738     | 43,129       | 18,609    |
| Low waning (hospitalization)    | 35,240,923             | 28,055,308   | 7,185,614  | 689,973          | 387,503      | 302,470   | 61,738     | 33,137       | 28,601    |

|                                             |            |            |            |         |         |         |        |        |        |
|---------------------------------------------|------------|------------|------------|---------|---------|---------|--------|--------|--------|
| High waning (hospitalization)               | 35,240,923 | 28,055,308 | 7,185,614  | 689,973 | 458,419 | 231,554 | 61,738 | 40,130 | 21,608 |
| Vaccine Coverage (75% of base case)         | 35,240,923 | 30,083,501 | 5,157,422  | 689,973 | 486,125 | 203,848 | 61,738 | 42,449 | 19,289 |
| Vaccine Coverage (50% of base case)         | 35,240,923 | 31,859,918 | 3,381,005  | 689,973 | 553,622 | 136,350 | 61,738 | 48,771 | 12,968 |
| Immune Escape April 2024                    | 43,148,725 | 38,087,118 | 5,061,607  | 842,573 | 612,108 | 230,465 | 74,951 | 53,768 | 21,183 |
| Immune Escape June 2024                     | 39,068,442 | 34,279,489 | 4,788,953  | 759,749 | 532,840 | 226,909 | 67,622 | 46,392 | 21,230 |
| Adjusted Tokyo Data (2.5x)                  | 33,985,577 | 32,520,032 | 1,465,545  | 566,310 | 420,523 | 145,788 | 51,468 | 37,864 | 13,604 |
| Adjusted Tokyo Data (1.5x)                  | 33,606,420 | 22,216,834 | 11,389,586 | 829,881 | 408,036 | 421,845 | 72,775 | 34,126 | 38,648 |
| Seasonality: $\phi=0.2$                     | 36,426,098 | 28,859,505 | 7,566,593  | 723,775 | 432,012 | 291,762 | 65,096 | 37,601 | 27,496 |
| Adjusted Tokyo Data (2.0x), Revised Waning* | 39,927,629 | 38,219,091 | 1,708,538  | 888,266 | 612,731 | 275,534 | 78,996 | 53,710 | 25,286 |
| Low percentage with symptoms                | 31,534,370 | 25,104,521 | 6,429,849  | 617,403 | 373,892 | 243,511 | 55,245 | 32,329 | 22,916 |
| High percentage with symptoms               | 38,942,262 | 31,001,946 | 7,940,316  | 762,440 | 461,725 | 300,715 | 68,222 | 39,923 | 28,299 |

**\* 2 Booster Strategy: One dose is offered to adults aged 18 years and older in Fall 2023; A second booster dose is offered to high risk individuals aged 18 – 64 and all individuals ages 65 years and older in Spring 2024.**

**Table S5. Economically Justifiable Price Difference\* (Moderna Price Difference vs. Pfizer-BioNTech)**

| <b>Scenario</b>                            | <b>Moderna Price Difference vs. Pfizer-BioNTech<sup>†</sup></b> |                   |                    |
|--------------------------------------------|-----------------------------------------------------------------|-------------------|--------------------|
|                                            | <b>¥5 mil WTP</b>                                               | <b>¥6 mil WTP</b> | <b>¥10 mil WTP</b> |
| Base-case                                  | ¥5,022                                                          | ¥5,860            | ¥9,212             |
| Relative vaccine effectiveness lower bound | ¥2,829                                                          | ¥3,303            | ¥5,199             |
| Relative vaccine effectiveness upper bound | ¥7,480                                                          | ¥8,726            | ¥13,709            |

<sup>†</sup>Vaccine administration cost is equivalent for Moderna and Pfizer vaccines, so estimates reflect the economically justifiable price difference

\* The price difference between Moderna and Pfizer-BioNTech is the same regardless of the unit cost of the Moderna vaccine.
